# Supplementary material for: Evaluation of Self-Collected Versus Health Care Professional (HCP)-Performed Sampling and the Potential Impact on the Diagnostic Results of Asymptomatic Sexually Transmitted Infections (STIs) in High-Risk Individuals
Source: MDPI journal article supplement (doi:10.3390/idr15050047), 2023-08-25
Supplement: s1 [file s1]

---

## Supplementary Material

**Table S1:** Challenges reported by participants in rectal self-sampling.

|                                                                          | n  | %    |
|--------------------------------------------------------------------------|----|------|
| Pain                                                                     | 43 | 18.7 |
| Bleeding                                                                 | 2  | 0.9  |
| Problems inserting the swab                                              | 1  | 0.4  |
| Problems transferring the swab to the container                          | 2  | 0.9  |
| I did not understand the written instructions on how to perform the swab | 4  | 1.7  |
| I needed help from another person                                        | 0  | 0.0  |

**Table S2:** Additional free-text answers concerning additional challenges/problems reported for rectal self-sampling. Only answers occurring more than once are listed.

|                                | n  |
|--------------------------------|----|
| Dryness                        | 10 |
| Difficulty identifying orifice | 4  |
| None                           | 6  |
| Swab depth challenges          | 3  |
| Swab insertion challenges      | 3  |

**Table S3:** Challenges reported by participants in oropharyngeal sampling.

|                                                                          | n  | %   |
|--------------------------------------------------------------------------|----|-----|
| Pain                                                                     | 14 | 6.1 |
| Bleeding                                                                 | 0  | 0.0 |
| Gagging                                                                  | 0  | 0.0 |
| Problems transferring the swab to the container                          | 0  | 0.0 |
| I did not understand the written instructions on how to perform the swab | 1  | 0.4 |
| I needed help from another person                                        | 0  | 0.0 |

**Table S4:** Additional free text answers concerning additional challenges/problems reported for oropharyngeal self-sampling. Only answers occurring more than once are listed.

|                         | n  |
|-------------------------|----|
| Color coding challenges | 2  |
| Gagging                 | 21 |
| None                    | 5  |

**Table S5:** Challenges reported by participants in urine self-sampling.

|                                                                          | n  | %   |
|--------------------------------------------------------------------------|----|-----|
| Could not collect urine into the container                               | 5  | 2.2 |
| I did not understand the written instructions on how to perform the swab | 11 | 4.8 |
| I needed help from another person                                        | 0  | 0.0 |

**Table S6:** Additional free text answers concerning additional challenges/problems reported for urine sampling. Only answers occurring more than once are listed.

|                                                          | n |
|----------------------------------------------------------|---|
| Difficulties urinating                                   | 4 |
| Missing information on how to proceed with the container | 9 |
| None                                                     | 8 |

Figure S1. General study information.



### Allgemeine Informationen zur SWAPTI-Studie

Vielen Dank für die Teilnahme an dieser Studie. Sie untersucht die diagnostische Genauigkeit von selbst entnommenen Abstrichen im Vergleich zu ärztlich entnommenen Abstrichen in der Diagnostik sexuell übertragbarer Erkrankungen.

**Anleitung:**

- 1 Nehmen Sie sich **genügend Zeit** für die Durchführung der Proben.
- 2 Wichtig ist es, **2-4 Stunden** vor der Uringewinnung keinen Urin gelöst zu haben.
- 3 Lesen Sie sich zunächst **alle Anleitungen** durch, um die Durchführung zu verstehen.
- 4 Führen Sie **folgende Abstriche** durch:
  - Rachenabstrich
  - Uringewinnung
  - Rektaler Abstrich
- 5 Geben Sie **die Proben an das Studienzentrum zurück**.
- 6 Bitte **beantworten** Sie uns noch **einige Fragen zum Ablauf** auf einem Tablet. Die Fragen und Antworten sind **pseudonymisiert** und die Mitarbeiter haben keinen direkten Zugriff auf Ihre eingegebenen Informationen.
- 7 Sollten sich behandlungsbedürftige Befunde ergeben, werden Sie von Ihrem behandelnden Arzt kontaktiert und **erhalten eine entsprechende Therapie**.

Klinikum rechts der Isar der Technischen Universität München  
Innere Medizin II, Infektiologie, Studienzentrum

Figure S2. Manual for oropharyngeal sampling.

**IRI**
**TUM**

## SWAPTI-Studie

### Rachenabstrich





**1**

**Vorbereitung**  
Hände mit Seife sorgfältig waschen.



**2**

**Abstrich-Tupfer öffnen**  
Das Wattestäbchen durch Drehung aus dem Röhrchen ziehen



**3**

**Abstrichbereiche im Rachen**  
Die markierten Punkte zeigen die Bereiche für den Abstrich an.



**4**

**Abstrich durchführen**  
Das Wattestäbchen mit leichtem Druck, wie abgebildet, am Rachen entlang streichen und mehrfach wiederholen. Hierbei kann ein leichter Würgereiz auftreten.



**5**

**Abstrich-Tupfer verschliessen**  
Das Wattestäbchen zurück in das Röhrchen drehen und fest verschliessen.

Klinikum rechts der Isar der Technischen Universität München  
Innere Medizin II, Infektiologie, Studienzentrum

Figure S3. Manual for rectal sampling.




## SWAPTI-Studie

### Rektaler Abstrich



- 

**1**

**Vorbereitung**  
Hände mit Seife sorgfältig waschen.
- 

**2**

**Abstrich-Tupfer öffnen**  
Das Wattestäbchen durch Drehung aus dem Röhrchen ziehen
- 

**3**

**Halten des Abstrichröhrchens**  
Das Abstrichröhrchen im Bereich der Einkerbung zwischen Daumen, Zeige- und Mittelfinger halten.
- 

**4**

**Platzieren des Abstrichröhrchens**  
Das Abstrichröhrchen soll über dem Anus gehalten und etwa 3 cm weit eingeführt werden. Hierbei hilft es, ein Bein im Liegen oder Stehen anzuwinkeln und eine Gesäßbacke mit der anderen Hand zur Seite zu ziehen.
- 

**5**

**Durchführung des rektalen Abstriches**  
Das Abstrichröhrchen etwa 3 cm tief für etwa 10 Sekunden im und entgegen dem Uhrzeigersinn um 360° drehen.
- 

**6**

**Abstrich-Tupfer verschliessen**  
Das Wattestäbchen zurück in das Röhrchen drehen und fest verschliessen.

Klinikum rechts der Isar der Technischen Universität München  
Innere Medizin II, Infektiologie, Studienzentrum

**Figure S4.** Manual for urine collection.




## SWAPTI-Studie

### Erststrahlurin



1



**Vorbereitung**

Hände mit Seife sorgfältig waschen.

2



**Gewinnung Urinprobe**

Lassen Sie idealerweise 2-4 Stunden vor der Uringewinnung keinen Harn und fangen Sie direkt die ersten Tropfen/Strahl auf. Dann etwa ein Viertel des Bechers mit Erststrahlurin befüllen.

3



**UriSponge öffnen**

Den UriSponge durch Drehung aus dem Röhrchen ziehen.

4



**Eintauchen des UriSponges**

Den UriSponge für einige Sekunden im Urinbecher tränken.

5



**UriSponge verschließen**

Den UriSponge zurück in das Röhrchen drehen und fest verschließen.

Klinikum rechts der Isar der Technischen Universität München  
Innere Medizin II, Infektiologie, Studienzentrum
